# Supplementary material for: Three-dimensional tooth surface texture analysis on stall-fed and wild boars (Sus scrofa)
Source: PLoS One. 2018 Oct 23;13(10):e0204719. doi: 10.1371/journal.pone.0204719 (PMC6198946; doi:10.1371/journal.pone.0204719)
Supplement: S1 Table — a. Material ratio: the ratio of surface area over given height c to all surface area. (XLSX) [file pone.0204719.s004.xlsx]

## Sheet: Table S1
	Parameter	Description	Unit	Wild (L)				Wild (S)				Stall-Fed
				Median	Minimum	Maximum	SD	Median	Minimum	Maximum	SD	Median	Minimum	Maximum	SD
	Sq	Root mean square height (i.e., standard deviation of the height distribution)	µm	0.8465	0.395755	1.58763	0.409093	1.27162	0.635669	2.35177	0.56427	1.89746	0.581318	3.20915	0.846967
	Ssk	Skewness of the scale limited surface (i.e., skewness of the height distribution)	<no unit>	-0.328399	-1.46043	0.158412	0.433145	-0.610055	-1.22975	-0.0998644	0.314687	-0.523504	-0.954815	0.18598	0.273833
	Sku	Kurtosis of the scale limited surface (i.e., kurtosis of the height distribution)	<no unit>	3.70639	2.28751	7.44775	1.39484	3.59188	2.35844	5.39794	0.995258	3.49814	2.69732	5.06451	0.613138
	Sp	Maximum peak height	µm	3.345	1.232	7.707	1.79987	4.8235	1.828	9.753	2.34217	7.204	2.072	12.468	3.27053
	Sv	Depth between the mean plane and the deepest valley	µm	3.554	1.557	5.476	1.14054	6.1355	3.133	12.627	2.73511	8.7315	2.749	16.537	4.38767
	Sz	Maximum height (i.e., height between the highest peak and the deepest valley)	µm	6.4755	3.136	12.28	2.77303	10.557	5.262	22.38	4.93429	17.896	4.821	26.001	7.01055
	Sa	Arithmetical mean height	µm	0.612576	0.308732	1.3059	0.331816	0.968931	0.473787	1.87043	0.462593	1.4785	0.457357	2.55975	0.668038
	Smr	Areal material ratio, bearing area ratio at a given height c (c = 1 mm under the highest peak)	%	0.339255	0.000713669	29.2264	8.14521	0.0097851	0.000339072	6.05387	1.66202	0.010554	0.00193044	6.45969	1.80009
	Smc	Height at a given material ratioa p (p = 10 %)	µm	0.856465	0.466827	2.24256	0.554652	1.39544	0.692994	2.81948	0.67806	2.38645	0.72461	3.922	1.04484
	Sxp	Difference in height between q% and p% material ratioa (p = 50 %, q = 97.5 %)	µm	2.08568	0.840992	3.39254	0.833344	2.84465	1.60638	5.78756	1.29032	4.36211	1.31133	7.24483	1.92507
	Sal	Auto-correlation length	µm	27.9826	17.7972	33.2585	5.2126	27.5852	19.2844	33.2342	3.89293	27.0845	19.4638	31.6441	3.24968
	Str	Texture aspect ratio	<no unit>	0.493482	0.199778	0.841051	0.195877	0.640875	0.194361	0.838297	0.218381	0.512771	0.31174	0.702924	0.124783
	Std	Texture direction	°	74.2533	19.0004	141.99	34.2344	55.627	11.5006	167.753	50.1698	45.8765	3.75727	126.251	40.9789
	Sdq	Root mean square gradient	<no unit>	0.286319	0.190589	0.470593	0.0783436	0.567797	0.226984	1.24263	0.303358	0.796085	0.187483	1.5683	0.389069
	Sdr	Developed interfacial area ratio	%	3.40768	1.7383	8.02002	1.65666	9.23943	2.36262	30.6001	7.98835	14.7796	1.71249	42.7349	10.8576
	Vm	Material volume at a given height between two material ratiosa p and q (p = 10 %, q = 80 %)	µm³/µm²	0.0335256	0.0143581	0.0975677	0.0217689	0.0368965	0.0180936	0.102213	0.0230118	0.0738861	0.023456	0.129279	0.035186
	Vv	Void volume at a given material ratioa p (p = 10 %)	µm³/µm²	0.893643	0.485397	2.28153	0.569208	1.4449	0.718736	2.87648	0.696529	2.47511	0.748488	4.05135	1.07511
	Vmp	Material volume of peaks (p = 10%)	µm³/µm²	0.0335256	0.0143581	0.0975677	0.0217689	0.0368965	0.0180936	0.102213	0.0230118	0.0738861	0.023456	0.129279	0.035186
	Vmc	Material volume of the core between two material ratiosa p and q (p = 10 %, q = 80 %), calculated in the zone between c1 and c2	µm³/µm²	0.651464	0.34399	1.58158	0.391416	1.0537	0.50667	2.21423	0.56434	1.66005	0.499552	3.02704	0.768965
	Vvc	Void volume of the core, between two material ratiosa p and q (p = 10 %, q = 80 %), calculated in the zone between c1 and c2	µm³/µm²	0.769536	0.43001	2.13842	0.533367	1.25463	0.61833	2.55455	0.630859	2.23068	0.672448	3.67192	0.964803
	Vvv	Void volume of the valleys, between a material ratioa p (p = 80 %) and 100% material ratioa, calculated in the zone below c2	µm³/µm²	0.120845	0.0505076	0.207047	0.0502769	0.165427	0.100405	0.33129	0.077389	0.282482	0.0760399	0.430464	0.119708
	Spd	Density of peaks	1/µm²	0.00240782	0.000318739	0.0159151	0.00433288	0.00455393	0.000459304	0.0123799	0.00313574	0.00385734	0.00149125	0.00832932	0.00189132
	Spc	Arithmetic mean peak curvature	1/µm	3.23068	1.26568	6.66033	1.85273	6.65779	2.45317	9.58483	2.42777	8.91339	1.39238	10.3925	2.64852
	S10z	Ten-point height	µm	3.5758	1.5354	4.8206	1.16355	5.4256	2.9806	9.745	2.49764	8.133	2.4796	13.9724	3.93002
	S5p	Five-point peak height	µm	1.2632	0.7324	3.0084	0.605009	2.6942	0.7908	5.3356	1.37716	3.302	0.3444	6.5904	1.86813
	S5v	Five-point valley height	µm	1.9385	0.803	3.5986	0.833769	2.8734	1.8554	6.2754	1.4673	4.7694	1.43	9.2426	2.53874
	Sda	Average area of dales connected to the edge at height c (c: height at 50 % material ratio)	µm²	582.073	69.1763	3112.56	761.65	506.132	222.678	922.478	197.027	436.818	334.671	1342.94	294.027
	Sha	Average area of hills connected to the edge at height c (c: height at 50 % material ratio)	µm²	264.163	54.9894	857.487	206.379	165.839	64.0433	754.259	174.171	174.736	83.9552	403.203	82.1207
	Sdv	Closed dale volume	µm³	10.3863	1.03877	89.6516	22.6523	13.7557	5.99234	30.3445	6.39895	14.6241	5.11864	420.354	108.48
	Shv	Average volume of hills connected to the edge at height c (c: height at 50 % material ratio)	µm³	4.9177	0.808829	37.9843	10.5705	5.8196	2.11835	27.0404	6.83915	7.48468	2.02748	26.0964	5.86369
	Sk	Distance between the highest and lowest level of the core surface	µm	0.378355	0.229629	0.624378	0.101512	0.557707	0.304902	1.05464	0.225808	0.767156	0.304166	1.28662	0.284189
	Spk	Average height of the protruding peaks above the core surface	µm	0.168772	0.118825	0.304265	0.0506559	0.423163	0.153091	0.9595	0.247022	0.565501	0.128604	1.30149	0.363
	Svk	Average height of the protruding dales below the core surface	µm	0.250812	0.157229	0.441449	0.0786819	0.501832	0.210864	0.836193	0.210682	0.639615	0.188931	1.08442	0.263672
	Smr1	Ratio of the area of the material at the intersection line which separates the protruding hills from the core surface to the evaluation area	%	9.5277	8.31026	10.5645	0.741473	9.75873	8.97408	12.0226	1.04936	10.1781	8.1736	12.0637	1.13161
	Smr2	Ratio of the area of the material at the intersection line which separates the protruding dales from the core surface to the evaluation area	%	86.6874	84.6223	89.707	1.34775	85.4943	83.978	87.2749	1.14505	86.1033	80.0699	88.2636	2.314
